## Informed choice of methylation analyses

# 1 **Invertebrate methylomes provide insight into mechanisms of environmental** 2 **tolerance and reveal methodological biases**

3  
4 Shelly A. Trigg\*<sup>1</sup>, Yaamini R. Venkataraman\*<sup>1</sup>, Mackenzie R. Gavery<sup>2</sup>, Steven B.  
5 Roberts<sup>1</sup>, Debashish Bhattacharya<sup>3</sup>, Alan Downey-Wall<sup>4</sup>, Jose M. Eirin-Lopez<sup>5</sup>, Kevin M.  
6 Johnson<sup>6,7</sup>, Katie E. Lotterhos<sup>4</sup>, Jonathan B. Puritz<sup>8</sup> and Hollie M. Putnam<sup>8+</sup>

7  
8 <sup>1</sup> University of Washington, School of Aquatic and Fishery Sciences 1122 NE Boat St.  
9 Seattle, WA, 98195, USA

10 <sup>2</sup> Environmental and Fisheries Sciences Division, Northwest Fisheries Science Center,  
11 National Marine Fisheries Service, National Oceanic and Atmospheric Administration,  
12 2725 Montlake Blvd E, Seattle, WA, 98112, USA

13 <sup>3</sup> Department of Biochemistry and Microbiology, Rutgers University, New Brunswick, NJ  
14 08901 USA

15 <sup>4</sup> Department of Marine and Environmental Sciences, Northeastern University, 430 Nahant  
16 Road, Nahant, MA 01908

17 <sup>5</sup> Florida International University, Environmental Epigenetics Laboratory, Institute of  
18 Environment 3000 NE 151 St. North Miami, FL, 33181, USA

19 <sup>6</sup> Center for Coastal Marine Sciences, California Polytechnic State University, San Luis  
20 Obispo, CA, 93407, USA

21 <sup>7</sup> California Sea Grant, University of California San Diego, La Jolla, CA, 92093

22 <sup>8</sup> Department of Biological Sciences, University of Rhode Island, Kingston, RI 02881, USA

23  
24 + corresponding author: [hputnam@uri.edu](mailto:hputnam@uri.edu)

25  
26 \* joint first authors/equal contribution

27  
28 **Keywords:** bisulfite sequencing, coral, epigenetics, marine invertebrate

29  
30  
31  
32

## Informed choice of methylation analyses

### 33 **Abstract**

34           There is a growing focus on the role of DNA methylation in the ability of marine  
35 invertebrates to rapidly respond to changing environmental factors and anthropogenic  
36 impacts. However, genome-wide DNA methylation studies in non-model organisms are  
37 currently hampered by limited understanding of methodological biases. Here we compare  
38 three methods for quantifying DNA methylation at single base pair resolution — Whole  
39 Genome Bisulfite Sequencing (WGBS), Reduced Representation Bisulfite Sequencing  
40 (RRBS), and Methyl-CpG Binding Domain Bisulfite Sequencing (MBDBS) — using  
41 multiple individuals from two reef-building coral species with contrasting environmental  
42 sensitivity. All methods reveal substantially greater methylation in *Montipora capitata*  
43 (11.4%) than the more sensitive *Pocillopora acuta* (2.9%). The majority of CpG  
44 methylation in both species occurs in gene bodies and flanking regions. In both species,  
45 MBDBS has the greatest capacity for detecting CpGs in coding regions at our sequencing  
46 depth, however MBDBS may be limited by intra-sample methylation heterogeneity. RRBS  
47 yields robust information for specific loci albeit without enrichment of any particular  
48 genome feature and with significantly reduced genome coverage. Relative genome size  
49 strongly influences the number and location of CpGs detected by each method when  
50 sequencing depth is limited, illuminating nuances in cross-species comparisons. These  
51 findings reinforce the role and importance of DNA methylation underlying environmental  
52 sensitivity in critical marine invertebrate taxa, and provide a genomic resource for  
53 investigating the functional role of DNA methylation in environmental tolerance.

54

## Informed choice of methylation analyses

### 55 **Introduction**

56 Environmental stimuli interact with genomic content to drive variation in gene and  
57 protein expression, resulting in phenotypic plasticity. This plasticity has the potential to  
58 buffer against mortality under environmental change (Baldwin, 1902), or conversely be  
59 maladaptive (Velotta et al., 2018). Furthermore, plasticity may enhance or diminish  
60 evolutionary rates (Ghalambor et al., 2007), which is particularly relevant to plasticity-  
61 evolution feedbacks (Ghalambor et al., 2007, 2015; Kronholm & Collins, 2016). This is of  
62 particular concern in the Anthropocene (Lewis & Maslin, 2015), as global change  
63 exacerbates the mismatch between phenotype and a rapidly changing environment.

64 The increase in negative global climate change consequences have prompted an  
65 intensification of research into phenotypic plasticity, gene regulation, and epigenetic  
66 mechanisms in non-model marine invertebrates (Eirin-Lopez & Putnam, 2019; Hofmann,  
67 2017; Roberts & Gavery, 2012). Specifically, carryover effects and cross and multi-  
68 generational plasticity in response to climate change (Byrne et al., 2020) may be  
69 generated by epigenetic regulation of gene expression (Dixon et al., 2018; Liew et al.,  
70 2018, 2020). As epigenetic research has increased, there has been a focus on DNA  
71 methylation, or the addition of a methyl group on the Cytosine residues in the genome,  
72 often in the Cytosine phosphate Guanine, or CpG context (Zemach et al., 2010). DNA  
73 methylation has gene expression regulation capacity through the interaction of base  
74 modification with transcriptional elements. Early bulk enzyme-based and fingerprinting  
75 methods for quantifying DNA methylation in marine invertebrates provided initial insights  
76 into DNA methylation and organismal phenotypic plasticity in response to environmental

## Informed choice of methylation analyses

77 changes (Dimond et al., 2017; Gavery & Roberts, 2010; Gonzalez-Romero et al., 2017;  
78 Putnam et al., 2016; Rodriguez-Casariago et al., 2018; Suarez-Ulloa et al., 2018).

79 Non-sequencing approaches that quantify global or bulk methylation [e.g.,  
80 colorimetric or fluorescent ELISAs (Dimond et al., 2017; Gavery & Roberts, 2010; Putnam  
81 et al., 2016; Rodriguez-Casariago et al., 2018)] are low-cost, rapidly applied, and do not  
82 require genomic resources to generate information on the responsiveness of the  
83 methylome. These global estimates do not, however, fully capture local changes in DNA  
84 methylation across different genome regions. Specifically, differences in the location and  
85 amount of methylation in two samples or treatments could lead to an incorrect conclusion  
86 when based on average percent methylation at the bulk level. Consequently, non-  
87 sequencing methods are limited in their ability to elucidate specific mechanisms of  
88 expression regulation and thus are unable to fully address the functional implications of  
89 methylation-driven regulation within the genome. In contrast, the use of genome-wide  
90 approaches that provide single base pair resolution allow the testing of hypotheses  
91 regarding spurious transcription, alternative splicing, and exon skipping (Roberts &  
92 Gavery, 2012). For example, the use of Whole Genome Bisulfite Sequencing (WGBS) to  
93 investigate the role of DNA methylation in regulating genes involved in caste specification  
94 in honeybees identified differential methylation in an exon of the *anaplastic lymphoma*  
95 *kinase (ALK)* gene; this exon was differentially retained in a splice variant between queens  
96 and workers (Foret et al., 2012). Thus there is a clear need for single base pair  
97 assessment of DNA methylomes facilitated by next generation sequencing to more fully  
98 elucidate the relationship of DNA methylation and gene expression in non-model  
99 invertebrates.

## Informed choice of methylation analyses

100            Genome-wide levels of DNA methylation can be estimated by several bisulfite  
101 conversion and sequencing approaches. Bisulfite conversion of DNA results in the  
102 deamination of unmethylated Cytosine to Uracil, which leaves a base change signature in  
103 the DNA that can be tracked via comparison of sequence between bisulfite-converted  
104 samples and reference genomes. While the number of bisulfite sequencing approaches  
105 are expanding [e.g., epiGBS (van Gorp et al., 2016)], the widely-used approaches are  
106 WGBS, Reduced Representation Bisulfite Sequencing (RRBS), and more recently,  
107 Methyl-CpG Binding Domain Bisulfite Sequencing (MBDBS). WGBS is considered to be  
108 the gold-standard of bisulfite sequencing because it provides full coverage of the genome  
109 and the capacity to detect the entire methylome at single base pair resolution.

110            While providing a comprehensive approach, the high cost of WGBS is juxtaposed  
111 against the often very small fraction of methylated DNA common in invertebrate genomes  
112 (Tweedie et al., 1997). Alternatively, approaches such as RRBS also use bisulfite  
113 conversion to quantitatively assess DNA methylation with base pair resolution. RRBS  
114 incorporates a restriction digestion of the genome to enrich for CpG rich regions, and is  
115 designed to capture the majority of promoters and other genomic regions containing CpG  
116 islands because they have important regulatory functions in vertebrates (Meissner et al.,  
117 2008). This is a more cost-effective approach provided by sequencing only a small portion  
118 of the genome, but requires restriction enzyme recognition sites near other CpGs to gather  
119 high resolution data. Since DNA methylation in invertebrates is primarily limited to coding  
120 regions (Dixon et al., 2018; Flores et al., 2012; Roberts & Gavery, 2012), it is less clear  
121 whether enrichment of CG-rich DNA using RRBS will capture informative or regulatory

## Informed choice of methylation analyses

122 regions of invertebrate genomes, making the cost savings moot in the absence of  
123 informative data.

124 In contrast to the CpG-rich, region-specific targeting of RRBS, MBDBS uses Methyl  
125 Binding Domain Proteins to target and enrich methylated CpGs, then employs bisulfite  
126 conversion to provide single base pair resolution of DNA fragments with methylated  
127 regions. Many marine invertebrate genomes consist of highly methylated regions that are  
128 distributed in predominantly unmethylated DNA in a mosaic pattern (Suzuki et al., 2007).  
129 When invertebrate methylomes have been characterized, these highly methylated regions  
130 overlap with gene bodies and have been shown to play a role in gene expression activity  
131 (Roberts & Gavery, 2012). Therefore, using an enrichment approach such as MBDBS to  
132 isolate gene body methylation can be a cost-effective and gene-body focused alternative  
133 to WGBS or RRBS (Gavery & Roberts, 2013; Venkataraman et al., 2020). The base-pair  
134 resolution offered by the combination of MBD enrichment and BS is an advantage  
135 compared to MBD-seq alone (Dixon & Matz, 2020), as the latter assumes that methylation  
136 level is proportional to read depth. In contrast to WGBS or RRBS, the quantification and  
137 interpretation of MBDBS data can be complicated by individual variation in methylation  
138 levels (e.g., one individual who has high methylation in a particular region would have  
139 reads, whereas another individual who lacks methylation in that region would have  
140 missing data).

141 Given the need to assess plasticity mechanisms and the acclimatization potential  
142 of a variety of marine taxa, it is critical to compare the potential of different approaches to  
143 to detect, quantify, and assess DNA methylation with respect to specific biological  
144 hypotheses of interest. To this end, we studied three DNA methylation quantification

## Informed choice of methylation analyses

145 approaches that provide single base pair resolution data using bisulfite conversion and  
146 sequencing: WGBS, RRBS, and MBDBS. We applied these methods to two reef building  
147 corals, *Montipora capitata* and *Pocillopora acuta*, which have different environmental  
148 sensitivity, phenotypic plasticity, inducible DNA methylation (Putnam et al., 2016), and  
149 genome sizes (Shumaker et al., 2019; Vidal-Dupiol et al., 2019). We assessed species-  
150 specific differences in genome-wide methylation and contrasted percent methylation of  
151 common loci and orthologous genes across methods. Then, we compared the coverage  
152 and genomic location of CpG data generated from the three methods. Compared to  
153 WGBS, both MBDBS and RRBS have advantages and potential limitations associated  
154 with biology, genome characteristics, and experimental design, highlighting the need to  
155 fully consider these aspects when evaluating DNA methylation for particular hypotheses  
156 of function in invertebrates. As part of this effort, we described DNA methylation  
157 differences in two coral species, providing valuable insights into the epigenetic  
158 underpinnings of phenotypic plasticity.

159

## 160 **Materials and Methods**

### 161 *Sample collection*

162 The reef-building scleractinian coral species *Montipora capitata* and *Pocillopora*  
163 *acuta* were collected from the reefs of Kane'ohe Bay Hawai'i under SAP 2019-60 between  
164 4 - 7 September 2018. Corals were transported to the Hawai'i Institute of Marine Biology  
165 where they were held in tanks under ambient conditions for 15 days and then snap frozen  
166 in liquid nitrogen and stored at -80°C until nucleic acid extraction was performed. For each

## Informed choice of methylation analyses

167 of the two coral species, fragments were collected from three different individuals collected  
168 from ambient conditions.

169

### 170 *Nucleic Acid Extraction*

171 Samples were removed from -80°C and small tissue fragments were clipped  
172 directly into a tube containing RNA/DNA shield (1 ml) and glass beads (0.5 mm). The  
173 tissue clippings consisted of all coral cell types and their symbionts. Samples were  
174 homogenized on a vortexer for 1 minute for the thin tissue imperforate coral *Pocillopora*  
175 *acuta* and 2 minutes for the thick tissue perforate coral *Montipora capitata* at maximum  
176 speed to ensure tissue extraction of all cell types. The supernatant was removed and DNA  
177 was extracted using the Zymo Quick-DNA/RNA™ Miniprep Plus Kit and subsequently  
178 checked for quality using gel electrophoresis on an Agilent 4200 TapeStation and  
179 quantified using a Qubit. In summary, one DNA preparation was made from each of the  
180 three individuals per coral species and was subsequently divided into three aliquots for  
181 each of the three bisulfite sequencing methods (WGBS, MBDBS, and RRBS) to yield a  
182 total of 18 libraries (**Figure 1**).

183

### 184 *Genome Information*

185 Previously sequenced and assembled coral genomes were used for mapping of  
186 DNA methylation data. These include *Montipora capitata* (Shumaker et al., 2019) and  
187 *Pocillopora acuta* (Vidal-Dupiol et al., 2019). Both of the coral genomes have a high and  
188 similar number of predicted genes (63,227 in *M. capitata* and 64,558 in *P. acuta*). However,  
189 *P. acuta* is much smaller in size (~352MB vs. ~886 MB in *M. capitata*), has less repetition,



## Informed choice of methylation analyses

190 a greater number of scaffolds (25,553 in *P. acuta* vs. 3,043 in *M. capitata*), and lower  
191 genome assembly continuity (N50 is 171,375 in *P. acuta* and 540,623 in *M. capitata*).

192 Genome feature tracks for *M. capitata* and *P. acuta* were derived directly from the  
193 published genomes for use in DNA methylation analyses. The *M. capitata* genome  
194 annotation yielded gene (a combination of AUGUSTUS and GeMoMa predictions), coding  
195 sequence, and intron tracks (Shumaker et al., 2019). Similarly, gene (AUGUSTUS  
196 predictions), coding sequence, and intron information was obtained from the *P. acuta*  
197 genome (Vidal-Dupiol et al., 2019). Flanking regions upstream and downstream of genes  
198 were generated with BEDtools v2.29.2 for each genome separately (Quinlan & Hall,  
199 2010); `flankBED` was used to generate 1000 bp flanks upstream and downstream of  
200 annotated genes from each genome. Overlaps between genes and flanks were removed  
201 from up- or down-stream flanking region tracks using `subtractBED`. Similarly, an  
202 intergenic region track was created by finding the complement of genes with  
203 `complementBED`, then removing any overlaps with flanking regions using `subtractBED`.  
204 All tracks were verified with the Integrative Genomics Viewer (Thorvaldsdóttir et al., 2013).  
205 Feature track files generated for both species are available in the project large file  
206 repository (Putnam et al., 2020)

207

### 208 *MBD Enrichment*

209 Before enrichment, DNA (1 µg) in 80 µL Tris HCl was sheared to 500 bp using a  
210 QSonica Q800R3. Samples were sonicated for 90 sec, with 15 sec on and 15 sec off  
211 intervals at 25% amplitude. Fragment length was checked using a D5000 TapeStation

## Informed choice of methylation analyses

212 System (Agilent Technologies) and samples were sonicated an extra 15 sec to shear DNA  
213 from 600 bp to 500 bp as needed.

214 The MethylMiner kit (Invitrogen; Cat. #ME10025) was used to enrich for methylated  
215 DNA prior to MBDBS library generation, with 1 $\mu$ g of input DNA. Manufacturer's  
216 instructions were adhered to with the following modifications: The capture reaction  
217 containing the fragmented DNA and MBD beads was incubated with mixing at 4°C  
218 overnight, and enriched DNA was obtained with a single fraction elution using 2,000 mM  
219 NaCl. Following ethanol addition, samples were centrifuged at 14,000 rcf at 1°C for five  
220 min. Pellets were resuspended in 25  $\mu$ L ultra-pure water. Captured DNA was quantified  
221 using a Qubit dsDNA HS Kit (Invitrogen).

222

### 223 *MBDBS and WGBS Library Preparation*

224 WGBS and MBDBS libraries were prepared using the Pico Methyl-Seq Library Prep  
225 Kit (ZymoResearch Cat. # D5456). Manufacturer's instructions were followed with the  
226 following modifications: For each sample, 1 ng of coral DNA and 0.05 ng of lambda phage  
227 DNA (ZymoResearch Cat. # D5016) were used. Samples were always centrifuged at  
228 12,000 rcf for 30 sec, however, samples were centrifuged for 12,000 rcf for 90 sec after  
229 the second 200  $\mu$ L addition of M Wash Buffer. Warmed elution buffer (56°C) was added  
230 to each sample to increase DNA elution yield. During the second amplification cycle, 0.5  
231  $\mu$ L of PreAmp Polymerase was added. After initial clean-up with the DNA Clean-up and  
232 Concentrator, the first amplification step was run for eight cycles. For amplification with i5  
233 and i7 index primers, 1  $\mu$ L of each primer was used to improve amplification. The volume

## Informed choice of methylation analyses

234 of the 2X LibraryAmp Master Mix was increased to 14  $\mu$ L to match the increase in index  
235 primers.

236 To remove excess primers from WGBS and MBDBS preparations, samples were  
237 cleaned with 11  $\mu$ L of KAPA pure beads (1X) (KAPA Cat # KK8000) and 80% ethanol.  
238 Cleaned samples were resuspended in 12  $\mu$ L of room-temperature DNA elution buffer  
239 from the Pico Methyl-Seq Library Prep Kit. Samples were re-amplified with either two or  
240 four cycles, depending on DNA concentration. Re-amplification was conducted with only  
241 0.5  $\mu$ L of each i5 and i7 index primer. After re-amplification, 26  $\mu$ L of KAPA pure beads  
242 (1X) and 80% ethanol were used for clean-up. Final samples were resuspended in 14  $\mu$ L  
243 of room-temperature elution buffer. Primer removal was confirmed by running samples on  
244 a D5000 TapeStation System.

245

### 246 *RRBS Library Prep*

247 RRBS libraries were prepared with the EZ DNA RRBS Library Prep Kit  
248 (ZymoResearch Cat. # D5460). Manufacturer's instructions were used with the following  
249 modifications: For MspI digestion, 300 ng of input DNA and 15 ng of lambda phage DNA  
250 were used. Digestions were carried out at 37°C for 4 hours. Adapter ligation was  
251 performed overnight, with samples held at 4°C once cycling was completed. Similar to  
252 WGBS and MBDBS library preparation, samples were always centrifuged at 12,000 rcf for  
253 30 sec, with the exception of 90 sec centrifugation after the second 200  $\mu$ L addition of M  
254 Wash Buffer. Warmed elution buffer (56°C) was added to each sample to increase DNA  
255 elution yield. Index primers were ligated using eleven cycles of the recommended  
256 thermocycling protocol. Samples were cleaned using 50  $\mu$ L of KAPA pure beads (1X) and

## Informed choice of methylation analyses

257 80% ethanol, then resuspended in 16  $\mu$ L of the elution buffer. Primer removal was  
258 confirmed by running samples on a D5000 TapeStation System.

259

### 260 *DNA Sequence Alignment*

261 All libraries (n = 18) were pooled in equimolar amounts and loaded at 250 pM onto  
262 a single Illumina NovaSeq S4 flow cell lane for 2x150 bp sequencing at Genewiz (South  
263 Plainfield, NJ). This was estimated to give 111-138 M reads per library and 99-123x  
264 coverage of the *P. acuta* genome (3.3 M bp) and 38-47x coverage of the *M. capitata*  
265 genome (8.8 M bp), assuming 100% even coverage (e.g., 150 bp read \* 2 pairs \* 111 M  
266 reads/336,684,533 bp for *P. acuta*).

267 Sequence quality was checked by FastQC v0.11.8 and adapters from paired-end  
268 sequences were trimmed using TrimGalore! version 0.4.5 (Krueger, 2012). Following  
269 recommendations for methylation sequence analysis from the manufacturer's protocol  
270 and from the Bismark User Guide, 10 bp were hard trimmed from the 5' and 3' end of each  
271 read for WGBS and MBDBS samples, and RRBS samples were trimmed with --  
272 `non_directional` and --`rrbs` options. Bisulfite-converted genomes were created in-  
273 silico with Bowtie 2-2.3.4 [Linux x84\_64 version; (Langmead & Salzberg, 2012)) using  
274 `bismark_genome_preparation` through Bismark v0.21.0 (Krueger & Andrews, 2011).  
275 Trimmed reads were aligned to the BS-converted *P. acuta* genome (Vidal-Dupiol et al.,  
276 2019) and the BS-converted *M. capitata* genome (Shumaker et al., 2019) with Bismark  
277 v0.21.0 with alignment stringency set by `-score_min L,0,-0.6` and the default MAPQ  
278 score threshold of 20. To check mapping rates for endosymbionts and quantify percent

## Informed choice of methylation analyses

279 methylation, trimmed reads from *P. actua* libraries were also aligned to the *Cladicopium*  
280 *goreau* genome [type C1, previously *Symbiodinium goreau* (Liu et al., 2018)] using the  
281 same settings as specified above. Reads that mapped ambiguously were excluded and  
282 alignment files containing uniquely mapped reads were deduplicated with  
283 `deduplicate_bismark` for WGBS and MBDBS samples only. Methylation calls were  
284 extracted from sorted deduplicated alignment files using  
285 `bismark_methylation_extractor`. Cytosine coverage reports were generated using  
286 `coverage2cytosine` with the `--merge_CpG` option to combine data from both strand  
287 methylation. Resulting files include bedgraphs and Bismark coverage files (Putnam et al.,  
288 2020). MultiQC v1.8 (Ewels et al., 2016) was run on the trimmed reads, FastQC output,  
289 and Bismark reports to assess quality and summarize results.

290

### 291 *Bisulfite conversion efficiency assessment*

292 Trimmed sequence reads were aligned to the genome of *E. coli* strain K-12  
293 MG1655 (Riley et al., 2006) using Bismark v0.21.0 with the `-non_directional` option  
294 and alignment stringency set by `-score_min L,0,-0.6`. Bisulfite conversion  
295 efficiency was also estimated from coral alignments as the ratio of the sum of  
296 unmethylated cytosines in CHG and CHH context to the sum of methylated and  
297 unmethylated cytosines in CHG and CHH. ANOVA was used to test for an effect of  
298 library preparation method on conversion efficiency within each species (conversion  
299 efficiency ~ library preparation method) for both estimated and lambda alignment  
300 calculated conversion efficiencies. A two-sample t-test was used to test if conversion

## Informed choice of methylation analyses

301 efficiency calculated from lambda alignments was the same as estimated conversion  
302 efficiency for each library preparation method within each species.

### 303 *Genome-Wide Methylation*

304       General *M. capitata* and *P. acuta* methylation was characterized to describe any  
305 species specific patterns. This was carried out by combining BEDgraphs derived from all  
306 methods for each species using `unionBedGraphs`. Percent methylation for every CpG  
307 locus with at least 5x coverage was averaged, irrespective of how many samples had  
308 coverage for that locus. Loci with no data within a method were excluded from downstream  
309 analysis. CpGs were classified as being either highly methylated ( $\geq 50\%$  methylation),  
310 moderately methylated ( $>10\%$  and  $<50\%$ ), or lowly methylated ( $\leq 10\%$  methylation).

### 311 *Percent Methylation of Shared CpG Loci*

312       Comparisons of percent DNA methylation at CpG loci analyzed by more than one  
313 method were performed using the R-package `methyKit` (Akalin et al., 2012). A  
314 minimum of 5x coverage was required across all samples for a CpG locus to be  
315 considered in the analyses. The `unite` function in `methyKit` was used to identify CpG loci  
316 that were covered across all 9 samples (3 individuals per method) per species.  
317 Scatterplots and Pearson correlation coefficients were calculated using the function  
318 `getCorrelation`. Additionally, differential methylation tests were performed on  
319 pairwise comparisons between methods (WGBS versus RRBS, WGBS versus MBDBS,  
320 and RRBS versus MBDBS). Discordant methylation was quantified using a logistic

## Informed choice of methylation analyses

321 regression model on CpG loci that were covered across all 6 samples (3 samples from  
322 each method compared) in each pairwise comparison using the `calculateDiffMeth`  
323 function with default parameters.

324

### 325 *CpG Coverage*

326 To assess average genome-wide CpG coverage, the number of Cytosines passing  
327 different read depth thresholds (5x, 10x, 15x, 20x, 25x, 30x, 40x, and 50x) were totaled  
328 from the CpG coverage reports output by the Bismark `coverage2cytosine` function  
329 (detailed above) for each sample. These totaled CpGs were then relativized to the number  
330 of CpGs in their respective genomes (*M. capitata*, 28,684,519 CpGs; *P. acuta*, 9,155,620  
331 CpGs). Next, average and standard deviation of genome-wide CpG fractions were  
332 calculated for each method within each species (n = 3), and these were plotted across  
333 different read depth thresholds using `ggplot2` (Gómez-Rubio, 2017).

334 To estimate overall genome-wide CpG coverage, a downsampling analysis was  
335 performed by pooling all sample reads within a method and species. Briefly, trimmed fastq  
336 files were concatenated for each method and species then randomly subsampled to 50,  
337 100, 150, and 200 million reads. Next, alignment and methylation calling were carried out  
338 as described above on each subset, and the number of cytosines passing with 5 or more  
339 reads were totaled from CpG coverage reports from each subset. Sequencing saturation  
340 was estimated from a Michaelis-Menten model with the 'drm' function from the R package  
341 `drc` (Ritz et al., 2015) using CpG coverage reports from subsampled data as input. Both

## Informed choice of methylation analyses

342 observed CpG coverage from subsampled data and estimated CpG coverage were  
343 plotted using the R package ggplot2 (Gómez-Rubio, 2017).

344

### 345 *Proportion of Detected CpGs for Orthologs*

346 To describe the differences in DNA methylation detected by each method at a more  
347 functional level, and given the connection of gene body methylation and gene expression  
348 in invertebrates (Roberts & Gavery, 2012) and corals specifically (Liew et al., 2018), the  
349 presence of CpG data within all genes was calculated for each species, by method. First,  
350 a CpG gff track was generated using EMBOSS (Rice et al., 2011) with the `fuzznuc`  
351 command searching for the pattern CG. For each sample, `intersectBED` was used to  
352 identify CpGs with 5x coverage that intersected with gene regions. This was also done for  
353 the reference genome CpG gff track. CpG counts per gene were compiled for each sample  
354 and the mean taken per method. The proportion of CpGs per orthologous gene was  
355 calculated by dividing the mean number of CpGs with 5x coverage from the three samples  
356 per method and dividing that by the number of CpG possible summed per gene from the  
357 reference genome CpG gff track. The proportion of CpG data in a gene was then  
358 visualized in heatmaps for all genes of *M. capitata* and *P. acuta*.

### 359 *Genomic Location of CpGs*

360 For both *M. capitata* and *P. acuta*, the overlap between genome feature tracks and  
361 species-specific CpG data at 5x coverage was characterized with BEDtools v2.29.2 to  
362 assess the presence CpGs in various regions by method (Quinlan & Hall, 2010). Since  
363 only gene, coding sequence, intron, flanking regions, and intergenic region tracks were



## Informed choice of methylation analyses

364 common between species, these were the tracks used in downstream analyses. A  
365 combination of PCoA, PERMANOVA and beta-dispersion tests, and chi-squared  
366 contingency tests were used to determine if the library preparation method influenced the  
367 proportion of CpGs detected in a specific genomic feature. A separate contingency test  
368 was used for each genomic feature.

369

## 370 **Results**

371 To compare the performance of bisulfite sequencing methods in the reef-building  
372 scleractinian corals *Montipora capitata* and *Pocillopora acuta*, we isolated DNA and  
373 generated WGBS, RRBS, and MBDBS libraries for three individuals from each species to  
374 yield a total of 18 libraries (**Figure 1**).

375 Sequencing of all 18 libraries resulted in  $1.82 \times 10^9$  read pairs, of which 99.1%  
376 remained after QC and trimming (Additional file 1: [Table ST1](#)). Individual libraries were  
377 generally sequenced to the same depth ( $\sim 7.5 \times 10^7$  reads) across library preparation  
378 methods and species, with the exception of *P. acuta* RRBS libraries, which were  
379 sequenced 2-4-fold deeper. The average mapping efficiencies for all *P. acuta* and all *M.*  
380 *capitata* libraries were 45% and 39% read alignments, respectively (Additional file 2: [Table](#)  
381 [ST2](#)). In comparison to other methods, MBDBS libraries had a larger proportion of reads  
382 ( $73.1\% \pm 9.9\%$ ) that did not align to the coral genomes (Additional file 3: [Figure SF1](#)). To  
383 investigate this we aligned *P. acuta* libraries to a known symbiont *Cladocopium goreaui*  
384 genome (C1 (Liu et al., 2018)) for which the genome sequence was available at the time  
385 of analysis. We found a sizable proportion of the MBDBS reads mapped to the symbiont  
386 genome ( $23.6 \pm 10.6\%$ ), while a much smaller proportion of RRBS and WGBS reads

## Informed choice of methylation analyses

387 mapped to the symbiont genome ( $5.04 \pm 0.22\%$  and  $1.92 \pm 0.3\%$  respectively) (Additional  
388 file 4: [Table ST3](#)).

389 Bisulfite conversion efficiency calculated from alignments of the unmethylated  
390 lambda DNA spike-in ranged from 98.6 to 99.3% in *M. capitata* and from 98.3 to 99.1% in  
391 *P. acuta* (Additional file 5: [Table ST4](#)), and this differed by library preparation method for  
392 both *M. capitata* ( $F_{df= X, P} = 1.676e^{-05}$ ) and *P. acuta* ( $F_{df= X, P} = 0.025$ ) libraries. In  
393 general, conversion efficiency calculated from the lambda alignments did not differ from  
394 conversion efficiency estimates from CHG and CHH methylation (under the assumption  
395 that non-CpG methylation does not occur in corals, see also (Liew et al., 2018)) from coral  
396 alignments in *M. capitata* and *P. acuta*. (Additional file 6: [Figure SF2 and Additional file](#)  
397 [7: Table ST5](#)).

398 For each species, the general methylation landscape was characterized for CpG  
399 loci with 5x coverage identified in any method. The *M. capitata* genome was more  
400 methylated than *P. acuta* (**Figure 2**). Using a cutoff of  $\geq 50\%$  methylation to define  
401 methylated CpGs, of the 13,340,268 CpGs covered by the *M. capitata* data, 11.4% were  
402 methylated. In contrast, only 2.9% of the 7,326,297 CpGs in *P. acuta* were methylated.  
403 Both genomes were predominantly lowly methylated ( $\leq 10\%$  methylated): 79.6% CpGs in  
404 *M. capitata* and 91.3% CpGs in *P. acuta* were lowly methylated. The remaining 9.0% of  
405 CpGs in *M. capitata* and 5.8% of CpGs in *P. acuta* were moderately methylated (10-50%  
406 methylation). The different methods captured varying proportions of highly, moderately,  
407 and lowly methylated CpGs (Additional file 8: [Figure SF3](#)).

## Informed choice of methylation analyses

408 For quantitative comparison of method performance, we reduced the dataset to loci  
409 covered at 5x read depth across all methods and samples for each species, referred to  
410 here as ‘shared loci’. The number of shared loci was 4,666 CpG for *M. capitata* and 93,714  
411 CpG for *P. acuta*. A PCA of CpG methylation for loci covered at 5x read depth showed  
412 that libraries tended to cluster in PC space by preparation method, rather than by  
413 individual (Additional file 9: [Figure SF4](#)). Variation in methylation levels of the shared loci  
414 across all *M. capitata* samples was lower within a method than between methods  
415 (Additional file 9: [Figure SF4A](#)). In contrast, for *P. acuta*, RRBS and WGBS methods  
416 showed similar methylation levels of shared loci but these were different from the  
417 methylation level of loci identified in MBDBS (Additional file 9: [Figure SF4B](#)). To further  
418 explore the variation in methylation observed by method, we directly correlated  
419 quantitative methylation calls for the shared loci (**Figure 3**). For *M. capitata*, correlations  
420 among biological replicates within a method were higher, whereas for *P. acuta*,  
421 correlations were lower and more variable. Correlations between pairs of methods for *M.*  
422 *capitata* ranged on average from 0.75-0.82, whereas correlations for *P. acuta* ranged from  
423 0.40-0.64. For *M. capitata*, WGBS versus MBDBS had the highest correlation. For *P.*  
424 *acuta*, WGBS versus RRBS had the highest correlation.

425 Discordance in methylation quantification between methods was evaluated by  
426 identifying the number of CpG loci with large differences (>50%) in methylation for each  
427 species. WGBS versus RRBS showed the lowest discordance in both species (0.4% for  
428 *M. capitata* and 0.5% for *P. acuta*). The highest discordance in methylation was found in  
429 comparisons with MBDBS for *P. acuta*, with 11% and 15% of CpG sites being called at  
430 least 50% different for comparisons with WGBS and RRBS, respectively. In contrast, only

## Informed choice of methylation analyses

431 0.4% and 5% of common CpG sites were at least 50% difference between MBDBS versus  
432 WGBS and MBDBS versus RRBS, respectively, for *M. capitata*. A majority of the  
433 discordance was due to higher methylation calls in MBDBS compared to WGBS or RRBS  
434 (**Figure 3B**).

435 Consistent with what would be expected based on genome size, *P. acuta* libraries  
436 have higher genome-wide CpG coverage than *M. capitata* regardless of library  
437 preparation method (**Figure 4A-C**). For both species, WGBS and MBDBS libraries  
438 covered more CpGs than RRBS libraries, whereas RRBS libraries tended to show greater  
439 read depth for the CpGs that it did cover. In other words, at >20x read depth, RRBS  
440 libraries covered more CpGs than either WGBS or MBDBS (**Figure 4** insets). Modelling  
441 increased sequencing depth for RRBS or MBDBS libraries showed little impact on the  
442 fraction of genome-wide CpGs covered in *M. capitata*, while increasing sequencing depth  
443 from 50 M to 200 M for WGBS libraries in both species and for MBDBS in *P. acuta* showed  
444 a substantially larger fraction of CpGs covered (Additional file 10: [Figure SF5](#)).

445 In order to assess the potential for cross-species comparisons using an equivalent  
446 dataset we quantified CpG data available across one-to-one orthologous genes. For *M.*  
447 *capitata*, WGBS yielded the highest proportion of CpGs, followed by RRBS, and then  
448 MBDBS (Additional file 11: **Figure SF6A**). This differed in *P. acuta* with WGBS yielding  
449 the highest proportion of CpGs on average across orthologs, followed by MBDBS, and  
450 then RRBS (Additional file 11: **Figure SF6B**).

451 In order to compare locations of CpG data between genomic features for each  
452 species and method, all CpGs with 5x coverage were characterized based on genomic  
453 feature location (**Figure 5**). Global PERMANOVA tests found significant differences

## Informed choice of methylation analyses

454 between library preparation methods for CpG coverage in various genome features for *M.*  
455 *capitata* and *P. acuta* (Additional file 12: [Table ST6](#)). Although post-hoc pairwise  
456 PERMANOVA tests did not reveal differences between sequencing methods, power for  
457 these was probably low (due to low sample size). Pairwise chi-squared tests indicated  
458 there are differences in CpG location for both species. In particular, CpGs in gene bodies  
459 were significantly enriched over other genomic features with MBDBS (**Figure 5**; Additional  
460 file 13: [Table ST7](#)). Visual inspection of PCoA also revealed the proportion of CpGs  
461 captured in coding sequences (CDS) drove differences between MBDBS and the other  
462 methods in both species (**Figure 5C-D**).

463

## 464 Discussion

465 We evaluated the performance of three approaches that use bisulfite-treated library  
466 preparation to enable single base pair resolution quantification of DNA methylation in  
467 corals. Our results demonstrate that the methylation landscape can vary significantly  
468 across species, which is a critical consideration for both interpreting environmental  
469 response capacity, and therefore for experimental design. We report significant  
470 differences in DNA methylation in two coral species that may contribute to their differential  
471 environmental sensitivity of these organisms (Gibbin et al., 2015; Putnam et al., 2016).  
472 Whereas WGBS is the gold standard for studying methylation, it comes at a high cost.  
473 MBDBS enriches for gene regions, which may be useful for taxa with gene body  
474 methylation. On the other hand, RRBS provides greater coverage depth for a smaller  
475 fraction of the genome, but lacks specificity for genomic features, or DNA methylation.  
476 Taken together, our findings indicate biology, genome architecture, regions of interest,

## Informed choice of methylation analyses

477 and depth of coverage are critical considerations when choosing methods for high  
478 resolution quantification of DNA methylation profiles in invertebrates.

479 *M. capitata* has a relatively high environmental tolerance (Bahr et al., 2016; Gibbin  
480 et al., 2015; Putnam et al., 2016), which has previously been attributed to its symbiont  
481 composition (Cunning et al., 2016), genome characteristics (Shumaker et al., 2019),  
482 perforate tissue-skeletal architecture and tissue thickness, and heterotrophic capacity  
483 (Rodrigues & Grottole, 2007). Of particular relevance to DNA methylation are genomic  
484 aspects such as gene family duplication and high repeat content in *M. capitata* (Shumaker  
485 et al., 2019). Given genetic-epigenetic correlations, particularly in the case of DNA  
486 methylation and the requirement for a CpG sequence target site (Dimond & Roberts, 2020;  
487 Johnson et al., 2020), variation in genome architecture, gene number, and content will  
488 impact the presence and use of DNA methylation as a mechanism of gene expression  
489 regulation. We found overall DNA methylation was higher in *M. capitata* than in *P. acuta*,  
490 supporting early bulk analyses of DNA methylation in these species (Putnam et al., 2016).  
491 While the predicted number of genes is similar, the genome size of *M. capitata* is over  
492 twice that of *P. acuta* (Shumaker et al., 2019; Vidal-Dupiol et al., 2019). One explanation  
493 for the higher methylation in *M. capitata* is that with greater energy availability — through  
494 translocation from high density Symbiodiniaceae populations and energy stores in  
495 perforate tissues — there is greater capacity for maintenance methyltransferase to  
496 maintain high methylation, and thus reduce gene expression variability and spurious  
497 expression (Liew et al., 2018; Li et al., 2018). High constitutive methylation could allow  
498 “frontloading” of stress response genes (e.g., (Barshis et al., 2013)), providing greater  
499 stress tolerance. Another possible explanation is that the higher level of methylation

## Informed choice of methylation analyses

500 contributes to the silencing of repeated genetic elements. In contrast, with a small and  
501 non-repetitive genome, imperforate thin tissues, and low energy reserves, *P. acuta* may  
502 be more energetically limited. Thus, *P. acuta* may be expected to show lower DNA  
503 methylation across the genome as we demonstrate here, as well as a higher propensity  
504 for inducible methylation in the presence of stressors (Putnam et al., 2016).

505 Another striking contrast in DNA methylation in these species is the lack of  
506 concordance in the percent methylation values for *P. acuta* among methods compared to  
507 *M. capitata* (**Figure 3**). The potential for chimerism in corals (Oury et al., 2020;  
508 Schweinsberg et al., 2015) and differences in tissue structure (e.g., perforate or  
509 imperforate) between species could contribute to differences in concordance across  
510 methods for quantifying DNA methylation. One possibility is that Pocilloporids are chimeric  
511 and multiple genotypes exist (Oury et al., 2020; Schweinsberg et al., 2015). Although  
512 percent DNA methylation concordance across methods was generally high, in *P. acuta*  
513 there was approximately a 10% higher level of discordance in percent methylation  
514 quantification when compared WGBS to RRBS or MBDBS (**Figure 3**). This discordance  
515 could have resulted from differences in *P. acuta* and *M. capitata* tissue structure. There is  
516 the potential to homogenize and extract DNA from all cell types from the thin, imperforate  
517 tissues of *P. acuta*, as opposed to the thick, perforate tissues in *M. capitata* (Putnam et  
518 al., 2017), likely contributing to a greater number of cell types, and thus methylation  
519 differences, captured in our *P. acuta* samples. Furthermore, the microhabitats created in  
520 the tissues of these two species likely differ substantially spatially (Putnam et al., 2017),  
521 creating cell-to-cell variability in methylation content. Since the likelihood of capturing  
522 multiple cell types in bulk DNA extractions varies with tissue structure, future studies

## Informed choice of methylation analyses

523 should consider methods such as fluorescence-activated cell sorting (Hu et al., 2020;  
524 Rosental et al., 2017), or laser microdissection (e.g., (Liew et al., 2018)), to target specific  
525 tissues or cell types and reduce cell-to-cell methylation variability. Whereas this does not  
526 necessarily indicate a bias in our methods, it highlights the needs to account for the  
527 biological characteristics of a species when designing an experiment and evaluating  
528 results.

529         The gold standard for bisulfite sequencing, WGBS, can be cost prohibitive  
530 particularly if comparing multiple species and treatments. As expected, we found that  
531 WGBS performed well, particularly for *P. acuta*, which has a smaller genome. Focusing  
532 on gene orthologs, WGBS performed the best in terms of data for CpGs per gene. Based  
533 on the gene ortholog comparisons, MBDBS provided more information than RRBS for *P.*  
534 *acuta*, however the opposite held true for *M. capitata*. This is likely attributable to the  
535 different genome size and inherent differences in methylation that result in differential  
536 enrichment.

537         For both species, WGBS and MBDBS libraries covered more CpGs than RRBS  
538 libraries; however, RRBS libraries showed greater read depth for CpGs. This is because  
539 RRBS subsampled a specific, smaller portion of the genome than MBDBS or WGBS,  
540 allowing more read coverage. Hence, CpG coverage did not largely increase when deeper  
541 sequencing was modeled using RRBS data (Additional file 10: [Figure SF5](#)). RRBS was  
542 designed to enrich for CpG islands, short stretches of DNA with higher levels of CpGs (~1  
543 CpG per 10bp), that are typically found in mammalian promoters and enhancer regions  
544 and thought to play a role in gene regulation (Gu et al., 2011). We found RRBS yielded a  
545 well-covered reduced representation of the genome, which is important for bisulfite data



## Informed choice of methylation analyses

546 where high read depth is desired, and locus methylation levels were concordant with  
547 WGBS for both species. However, RRBS did not enrich for promoters or other particular  
548 genomic regions compared to the other bisulfite sequencing methods (**Figure 5**), and in  
549 fact tended to identify unmethylated regions. For this reason, RRBS is not the best choice  
550 for gene-focused methylation studies in corals and other invertebrates.

551 A critical consideration in deciding to perform MBDBS in corals is the amount of  
552 DNA methylation present in any symbiont. If any non-target organisms have substantially  
553 more DNA methylation than the target organism, MBDBS data could become saturated  
554 by methylated DNA from non-target organisms, lowering sampling of the target species.  
555 We observed this in *P. acuta*, for which we had the genome of its Symbiodiniaceae which  
556 has ~90% genome-wide methylation (de Mendoza et al., 2018; Lohuis & Miller, 1998).  
557 When compared to RRBS and WGBS data, we found a 4 to 10-fold enrichment of  
558 Symbiodiniaceae DNA in *P. acuta* MBDBS data. Separation of host and symbionts is  
559 therefore recommended to obtain the greatest read counts for the organism of interest,  
560 but this comes at the cost of not being able to obtain RNA from the same nucleic acid  
561 pool. For example, physical separation of the host and symbiont in living cells impacts  
562 gene expression, and attempts at physical separation after freezing can degrade the host  
563 RNA. Simultaneous extraction of holobiont RNA and DNA from the same nucleic acid pool  
564 provides the optimal approach for detecting interactions between DNA methylation and  
565 epigenetic regulation of gene expression. This comes at the cost of generating excess  
566 reads to overcome highly methylated Symbiodiniaceae DNA.

567 MBDBS can enrich for gene regions in species where methylation is primarily found  
568 in gene bodies such as in corals (reviewed in (Eirin-Lopez & Putnam, 2019)), and can thus

## Informed choice of methylation analyses

569 provide insight into mechanisms underlying physiological or organismal responses. We  
570 found that MBDBS significantly enriched for gene bodies, specifically CDS and introns,  
571 when compared to RRBS and WGBS in both *M. capitata* and *P. acuta* (**Figure 5**). While  
572 MBDBS may be a good choice to examine gene body methylation at a reduced cost,  
573 species differences in CpG coverage within orthologous genes with MBDBS (Additional  
574 file 10: [Figure SF6](#)) may complicate cross-species comparisons by reducing the amount  
575 of data available for analysis. Additionally, we found high discordance between MBDBS  
576 and non-enrichment methods, WGBS and RRBS, for *P. acuta*. MBDBS is the only method  
577 we evaluated that can non-randomly sub-sample genomes present in a DNA sample  
578 through preferential pull-down of methylated DNA. Differences in methylation across the  
579 sampled genomes could result from cell-to-cell heterogeneity in methylation or cell-type  
580 (e.g., methylation of calcifying cells may differ from symbiont hosting cells). In other words,  
581 MBDBS data may represent only a subpopulation of highly methylated cells, while WGBS  
582 and RRBS represent the average methylation across all cells in the sample. Using a  
583 consistent tissue type is important to limit potential methylation heterogeneity, and caution  
584 should be taken when comparing MBDBS data directly to that of non-enrichment bisulfite  
585 sequencing approaches.

586         Although MBDBS did enrich for methylated regions of the genome, 80% of CpGs  
587 in *M. capitata* and 82% of CpGs in *P. acuta* interrogated with MBDBS were lowly  
588 methylated (<10% methylated) (Additional file 8: [Figure SF3](#)). This is expected and is  
589 consistent with previous reports applying MBDBS in other marine invertebrates where  
590 unmethylated CpGs actually represent the highest proportion of loci in the data,  
591 attributable to the nature of the methylation landscape and enrichment protocol (e.g.

## Informed choice of methylation analyses

592 (Gavery & Roberts, 2013; Venkataraman et al., 2020)). The base pair resolution of  
593 methylation revealed by MBDBS is a benefit over MBD-Seq alone because it enables a  
594 fine-scale examination of specific genomic features (e.g. exon-intron boundaries) that may  
595 not be possible with the regional resolution of MBD-Seq. Without complete knowledge of  
596 the relative importance of a single loci compared to a region, it is difficult to compare trade-  
597 offs between MBDBS and MBD-seq. However, bisulfite sequencing requires significant  
598 coverage to quantify DNA methylation.

599 MBDBS may have potential biases that should be considered when interpreting  
600 results. If a treatment, population comparison, or developmental change results in a given  
601 region (~500bp) going from being highly methylated to fully unmethylated, then it is likely  
602 that this region would not be interrogated by MBDBS, due to an absence of data in the  
603 unmethylated condition. This is a potential source of bias in MBDBS data and may  
604 contribute to important differentially methylated regions being overlooked: for example if  
605 one treatment results in high methylation and is captured by MBDBS and another  
606 treatment results in no methylation and is not captured by MBDBS, this region would be  
607 filtered out of the analysis because of missing data in some individuals. Further, the  
608 potential of MBDBS to provide limited information for unmethylated genes may introduce  
609 bias in studies that seek to draw relationships between methylation level and gene  
610 expression. Just as with many interpretations of key findings we present, a more complete  
611 understanding of the mechanistic functional role DNA methylation plays in genome  
612 regulation in the species of interest is needed.

613 There is a greater capacity to gain mechanistic insight when using methods that  
614 have single base pair resolution compared to methylation enrichment without bisulfite

## Informed choice of methylation analyses

615 treatment or bulk percent methylation approaches. For example, hypotheses such as the  
616 linkage between DNA methylation and alternative splicing (Roberts & Gavery, 2012) are  
617 more accurately tested with bisulfite sequencing approaches. We acknowledge the cost  
618 of generating genomic resources and bisulfite sequencing data can be higher than other  
619 approaches. While WGBS is supported here as the gold standard for DNA methylation  
620 quantification, consideration should be given to specific study hypotheses in light of the  
621 pros and cons of the enrichment or reduced representation approaches presented here  
622 and in other comparative works (Dixon & Matz, 2020). Our results suggest that it would  
623 be unwise to use multiple different library preparation methods for comparing individuals  
624 within a study, especially for studies in which familial relationships are to be compared. As  
625 technology advances, it would be ideal to move away from harsh bisulfite conversion to  
626 assess DNA methylation with single base pair resolution across whole genomes in the  
627 absence of DNA treatment (e.g., Oxford Nanopore).

628 Our results provide a quantitative comparative assessment that can be used to  
629 inform the choice of sequencing DNA methylation in corals and other non-model  
630 invertebrates. Together these metrics enable comparative capacity for three common  
631 methods in two coral taxa that vary in their phylogeny, genome size, symbiotic unions,  
632 and environmental performance, and thus provide the community with a more  
633 comprehensive foundation upon which to build laboratory and statistical analyses of DNA  
634 methylation, plasticity, and acclimatization.

635

## 636 **Abbreviations**

637 CpG: cytosine and guanine separated by a phosphate group

## Informed choice of methylation analyses

- 638 ELISA: Enzyme-Linked Immunosorbent Assay  
639 MBD-seq: Methyl-CpG Binding Domain Sequencing  
640 MBDBS: Methyl-CpG Binding Domain Bisulfite Sequencing  
641 RRBS: Reduced representation bisulfite sequencing  
642 WGBS: Whole genome bisulfite sequencing

643

## 644 **Acknowledgements**

645 We thank Putnam Lab members E. Strand and M. E. Schedl for their technical support.  
646 Data analyses were facilitated through the use of advanced computational, storage, and  
647 networking infrastructure provided by the Hyak supercomputer system at the University of  
648 Washington.

649

## 650 **Funding**

651 This work was partially supported by the USDA: National Institute of Food and Agriculture,  
652 Hatch projects RI0019-H020 to HMP, NJ01180 to DB, and the NRSP-8 National Animal  
653 Genome Research Program to HMP and SBR. This work was also partially supported by  
654 funding from the National Science Foundation: 1756623 to HMP, 1756616 to DB, 1921149  
655 to SBR, 1921402 to JEL, and 1635423 to KEL.

656

## 657 **References**

- 658 Akalin, A., Kormaksson, M., Li, S., Garrett-Bakelman, F. E., Figueroa, M. E., Melnick, A.,  
659 & Mason, C. E. (2012). methylKit: a comprehensive R package for the analysis of  
660 genome-wide DNA methylation profiles. *Genome Biology*, 13(10), R87.  
661 <https://doi.org/10.1186/gb-2012-13-10-r87>  
662 Bahr, K. D., Jokiel, P. L., & Rodgers, K. S. (2016). Relative sensitivity of five Hawaiian

## Informed choice of methylation analyses

- 663 coral species to high temperature under high-pCO<sub>2</sub> conditions. *Coral Reefs* , 35(2),  
664 729–738. <https://doi.org/10.1007/s00338-016-1405-4>
- 665 Baldwin, J. M. (1902). Development and evolution, including psychophysical evolution,  
666 evolution by orthoplasmy, and the theory of genetic modes.  
667 <https://doi.org/10.1037/13707-000>
- 668 Barshis, D. J., Ladner, J. T., Oliver, T. A., Seneca, F. O., Traylor-Knowles, N., &  
669 Palumbi, S. R. (2013). Genomic basis for coral resilience to climate change.  
670 *Proceedings of the National Academy of Sciences of the United States of America*,  
671 110(4), 1387–1392. <https://doi.org/10.1073/pnas.1210224110>
- 672 Byrne, M., Foo, S. A., Ross, P. M., & Putnam, H. M. (2020). Limitations of cross-and  
673 multigenerational plasticity for marine invertebrates faced with global climate  
674 change. *Global Change Biology*, 26(1), 80–102. <https://doi.org/10.1111/gcb.14882>
- 675 Cunning, R., Ritson-Williams, R., & Gates, R. D. (2016). Patterns of bleaching and  
676 recovery of *Montipora capitata* in Kāne ‘ohe Bay, Hawai ‘i, USA. *Marine Ecology*  
677 *Progress Series*, 551, 131–139. [https://www.int-res.com/abstracts/meps/v551/p131-](https://www.int-res.com/abstracts/meps/v551/p131-139/)  
678 [139/](https://www.int-res.com/abstracts/meps/v551/p131-139/)
- 679 de Mendoza, A., Bonnet, A., Vargas-Landin, D. B., Ji, N., Li, H., Yang, F., Li, L., Hori, K.,  
680 Pflueger, J., Buckberry, S., Ohta, H., Rosic, N., Lesage, P., Lin, S., & Lister, R.  
681 (2018). Recurrent acquisition of cytosine methyltransferases into eukaryotic  
682 retrotransposons. *Nature Communications*, 9(1), 1–11.  
683 <https://doi.org/10.1038/s41467-018-03724-9>
- 684 Dimond, J. L., Gamblewood, S. K., & Roberts, S. B. (2017). Genetic and epigenetic  
685 insight into morphospecies in a reef coral. *Molecular Ecology*, 26(19), 5031–5042.  
686 <https://doi.org/10.1111/mec.14252>
- 687 Dimond, J. L., & Roberts, S. B. (2020). Convergence of DNA Methylation Profiles of the  
688 Reef Coral *Porites astreoides* in a Novel Environment. *Frontiers in Marine Science*,  
689 6, 792. <https://doi.org/10.3389/fmars.2019.00792>
- 690 Dixon, G., Liao, Y., Bay, L. K., & Matz, M. V. (2018). Role of gene body methylation in  
691 acclimatization and adaptation in a basal metazoan. *Proceedings of the National*  
692 *Academy of Sciences of the United States of America*, 115(52), 13342–13346.  
693 <https://doi.org/10.1073/pnas.1813749115>
- 694 Dixon, G., & Matz, M. (2020). Benchmarking DNA methylation assays in a reef-building  
695 coral. *Molecular Ecology Resources*. <https://doi.org/10.1111/1755-0998.13282>
- 696 Eirin-Lopez, J. M., & Putnam, H. M. (2019). Marine Environmental Epigenetics. *Annual*  
697 *Review of Marine Science*, 11, 335–368. [https://doi.org/10.1146/annurev-marine-](https://doi.org/10.1146/annurev-marine-010318-095114)  
698 [010318-095114](https://doi.org/10.1146/annurev-marine-010318-095114)
- 699 Ewels, P., Magnusson, M., Lundin, S., & Källér, M. (2016). MultiQC: summarize analysis  
700 results for multiple tools and samples in a single report. *Bioinformatics* , 32(19),  
701 3047–3048. <https://doi.org/10.1093/bioinformatics/btw354>
- 702 Flores, K., Wolschin, F., Corneveaux, J. J., Allen, A. N., Huentelman, M. J., & Amdam,  
703 G. V. (2012). Genome-wide association between DNA methylation and alternative  
704 splicing in an invertebrate. *BMC Genomics*, 13, 480. [https://doi.org/10.1186/1471-](https://doi.org/10.1186/1471-2164-13-480)  
705 [2164-13-480](https://doi.org/10.1186/1471-2164-13-480)
- 706 Foret, S., Kucharski, R., Pellegrini, M., Feng, S., Jacobsen, S. E., Robinson, G. E., &  
707 Maleszka, R. (2012). DNA methylation dynamics, metabolic fluxes, gene splicing,

## Informed choice of methylation analyses

- 708 and alternative phenotypes in honey bees. *Proceedings of the National Academy of*  
709 *Sciences of the United States of America*, 109(13), 4968–4973.  
710 <https://doi.org/10.1073/pnas.1202392109>
- 711 Gavery, M. R., & Roberts, S. B. (2010). DNA methylation patterns provide insight into  
712 epigenetic regulation in the Pacific oyster (*Crassostrea gigas*). *BMC Genomics*,  
713 11(1), 483. <https://doi.org/10.1186/1471-2164-11-483>
- 714 Gavery, M. R., & Roberts, S. B. (2013). Predominant intragenic methylation is  
715 associated with gene expression characteristics in a bivalve mollusc. *PeerJ*, 1,  
716 e215. <https://doi.org/10.7717/peerj.215>
- 717 Ghalambor, C. K., Hoke, K. L., Ruell, E. W., Fischer, E. K., Reznick, D. N., & Hughes, K.  
718 A. (2015). Non-adaptive plasticity potentiates rapid adaptive evolution of gene  
719 expression in nature. *Nature*, 525(7569), 372–375.  
720 <https://doi.org/10.1038/nature15256>
- 721 Ghalambor, C. K., McKay, J. K., Carroll, S. P., & Reznick, D. N. (2007). Adaptive versus  
722 non-adaptive phenotypic plasticity and the potential for contemporary adaptation in  
723 new environments. *Functional Ecology*, 21(3), 394–407.  
724 [https://besjournals.onlinelibrary.wiley.com/doi/abs/10.1111/j.1365-](https://besjournals.onlinelibrary.wiley.com/doi/abs/10.1111/j.1365-2435.2007.01283.x)  
725 [2435.2007.01283.x](https://besjournals.onlinelibrary.wiley.com/doi/abs/10.1111/j.1365-2435.2007.01283.x)
- 726 Gibbin, E. M., Putnam, H. M., Gates, R. D., Nitschke, M. R., & Davy, S. K. (2015).  
727 Species-specific differences in thermal tolerance may define susceptibility to  
728 intracellular acidosis in reef corals. *Marine Biology*, 162(3), 717–723.  
729 <https://doi.org/10.1007/s00227-015-2617-9>
- 730 Gómez-Rubio, V. (2017). ggplot2 - Elegant Graphics for Data Analysis (2nd Edition). In  
731 *Journal of Statistical Software* (Vol. 77, Issue Book Review 2).  
732 <https://doi.org/10.18637/jss.v077.b02>
- 733 Gonzalez-Romero, R., Suarez-Ulloa, V., Rodriguez-Casariago, J., Garcia-Souto, D.,  
734 Diaz, G., Smith, A., Pasantes, J. J., Rand, G., & Eirin-Lopez, J. M. (2017). Effects of  
735 Florida Red Tides on histone variant expression and DNA methylation in the  
736 Eastern oyster *Crassostrea virginica*. *Aquatic Toxicology*, 186, 196–204.  
737 <https://doi.org/10.1016/j.aquatox.2017.03.006>
- 738 Gu, H., Smith, Z. D., Bock, C., Boyle, P., Gnirke, A., & Meissner, A. (2011). Preparation  
739 of reduced representation bisulfite sequencing libraries for genome-scale DNA  
740 methylation profiling. *Nature Protocols*, 6(4), 468–481.  
741 <https://doi.org/10.1038/nprot.2010.190>
- 742 Hofmann, G. E. (2017). Ecological Epigenetics in Marine Metazoans. *Frontiers in Marine*  
743 *Science*, 4, 4. <https://doi.org/10.3389/fmars.2017.00004>
- 744 Hu, M., Zheng, X., Fan, C.-M., & Zheng, Y. (2020). Lineage dynamics of the  
745 endosymbiotic cell type in the soft coral *Xenia*. In *Nature* (Vol. 582, Issue 7813, pp.  
746 534–538). <https://doi.org/10.1038/s41586-020-2385-7>
- 747 Johnson, K. M., Sirovy, K. A., Casas, S. M., La Peyre, J. F., & Kelly, M. W. (2020).  
748 Characterizing the Epigenetic and Transcriptomic Responses to *Perkinsus marinus*  
749 Infection in the Eastern Oyster *Crassostrea virginica*. *Frontiers in Marine Science*, 7.  
750 <https://doi.org/10.3389/fmars.2020.00598>
- 751 Kronholm, I., & Collins, S. (2016). Epigenetic mutations can both help and hinder  
752 adaptive evolution. *Molecular Ecology*, 25(8), 1856–1868.

## Informed choice of methylation analyses

- 753 <https://doi.org/10.1111/mec.13296>
- 754 Krueger, F. (2012). Trim Galore: a wrapper tool around Cutadapt and FastQC to  
755 consistently apply quality and adapter trimming to FastQ files, with some extra  
756 functionality for MspI-digested RRBS-type (Reduced Representation Bisulfite-Seq)  
757 libraries. URL [Http://www. Bioinformatics. Babraham. Ac. Uk/projects/trim\\_galore/](http://www.Bioinformatics.Babraham.Ac.Uk/projects/trim_galore/).  
758 (Date of Access: 28/04/2016).
- 759 Krueger, F., & Andrews, S. R. (2011). Bismark: a flexible aligner and methylation caller  
760 for Bisulfite-Seq applications. *Bioinformatics*, 27(11), 1571–1572.  
761 <https://doi.org/10.1093/bioinformatics/btr167>
- 762 Langmead, B., & Salzberg, S. L. (2012). Fast gapped-read alignment with Bowtie 2.  
763 *Nature Methods*, 9(4), 357–359. <https://doi.org/10.1038/nmeth.1923>
- 764 Lewis, S. L., & Maslin, M. A. (2015). Defining the anthropocene. *Nature*, 519(7542),  
765 171–180. <https://doi.org/10.1038/nature14258>
- 766 Liew, Y. J., Howells, E. J., Wang, X., Michell, C. T., Burt, J. A., Idaghdour, Y., & Aranda,  
767 M. (2020). Intergenerational epigenetic inheritance in reef-building corals. *Nature*  
768 *Climate Change*, 10(3), 254–259. <https://doi.org/10.1038/s41558-019-0687-2>
- 769 Liew, Y. J., Zoccola, D., Li, Y., Tambutté, E., Venn, A. A., Michell, C. T., Cui, G.,  
770 Deutekom, E. S., Kaandorp, J. A., Voolstra, C. R., Forêt, S., Allemand, D.,  
771 Tambutté, S., & Aranda, M. (2018). Epigenome-associated phenotypic  
772 acclimatization to ocean acidification in a reef-building coral. *Science Advances*,  
773 4(6), 188227. <https://doi.org/10.1126/sciadv.aar8028>
- 774 Liu, H., Stephens, T. G., González-Pech, R. A., Beltran, V. H., Lapeyre, B., Bongaerts,  
775 P., Cooke, I., Aranda, M., Bourne, D. G., Forêt, S., Miller, D. J., van Oppen, M. J.  
776 H., Voolstra, C. R., Ragan, M. A., & Chan, C. X. (2018). Symbiodinium genomes  
777 reveal adaptive evolution of functions related to coral-dinoflagellate symbiosis.  
778 *Communications Biology*, 1, 95. <https://doi.org/10.1038/s42003-018-0098-3>
- 779 Li, Y., Liew, Y. J., Cui, G., Cziesielski, M. J., Zahran, N., Michell, C. T., Voolstra, C. R., &  
780 Aranda Lastra, M. (2018). DNA methylation regulates transcriptional homeostasis of  
781 algal endosymbiosis in the coral model *Aiptasia*. *Sci Adv*, 4.
- 782 Lohuis, M. R., & Miller, D. J. (1998). Hypermethylation at CpG-Motifs in the  
783 dinoflagellates *Amphidinium carterae* (*Dinophyceae*): Evidence from restriction  
784 analyzes, 5-azacytidine and ethionine treatment. In *Journal of Phycology* (Vol. 34,  
785 Issue 1, pp. 152–159). <https://doi.org/10.1046/j.1529-8817.1998.340152.x>
- 786 Meissner, A., Mikkelsen, T. S., Gu, H., Wernig, M., Hanna, J., Sivachenko, A., Zhang,  
787 X., Bernstein, B. E., Nusbaum, C., Jaffe, D. B., Gnirke, A., Jaenisch, R., & Lander,  
788 E. S. (2008). Genome-scale DNA methylation maps of pluripotent and differentiated  
789 cells. *Nature*, 454(7205), 766–770. <https://doi.org/10.1038/nature07107>
- 790 Oury, N., Gélin, P., & Magalon, H. (2020). Together stronger: Intracolony genetic  
791 variability occurrence in *Pocillopora* corals suggests potential benefits. *Ecology and*  
792 *Evolution*, 10(12), 5208–5218. <https://doi.org/10.1002/ece3.5807>
- 793 Putnam, H. M., Barott, K. L., Ainsworth, T. D., & Gates, R. D. (2017). The Vulnerability  
794 and Resilience of Reef-Building Corals. *Current Biology: CB*, 27(11), R528–R540.  
795 <https://doi.org/10.1016/j.cub.2017.04.047>
- 796 Putnam, H. M., Davidson, J. M., & Gates, R. D. (2016). Ocean acidification influences  
797 host DNA methylation and phenotypic plasticity in environmentally susceptible



## Informed choice of methylation analyses

- 798 corals. *Evolutionary Applications*, 9(9), 1165–1178.  
799 <https://doi.org/10.1111/eva.12408>
- 800 Putnam, H. M., Roberts, S. B., & Venkataraman, Y. (2020). *Coral Methylation Methods*  
801 *Comparison*. Open Science Framework. <https://doi.org/10.17605/OSF.IO/X5WAZ>
- 802 Quinlan, A. R., & Hall, I. M. (2010). BEDTools: a flexible suite of utilities for comparing  
803 genomic features. *Bioinformatics*, 26(6), 841–842.  
804 <https://doi.org/10.1093/bioinformatics/btq033>
- 805 Rice, P. M., Bleasby, A. J., & Ison, J. C. (2011). *EMBOSS User's Guide: Practical*  
806 *Bioinformatics with EMBOSS*. Cambridge University Press.  
807 <https://play.google.com/store/books/details?id=zC5WGJxDNtcC>
- 808 Riley, M., Abe, T., Arnaud, M. B., Berlyn, M. K. B., Blattner, F. R., Chaudhuri, R. R.,  
809 Glasner, J. D., Horiuchi, T., Keseler, I. M., Kosuge, T., Mori, H., Perna, N. T.,  
810 Plunkett, G., 3rd, Rudd, K. E., Serres, M. H., Thomas, G. H., Thomson, N. R.,  
811 Wishart, D., & Wanner, B. L. (2006). *Escherichia coli* K-12: a cooperatively  
812 developed annotation snapshot--2005. *Nucleic Acids Research*, 34(1), 1–9.  
813 <https://doi.org/10.1093/nar/gkj405>
- 814 Ritz, C., Baty, F., Streibig, J. C., & Gerhard, D. (2015). Dose-Response Analysis Using  
815 R. *PloS One*, 10(12), e0146021. <https://doi.org/10.1371/journal.pone.0146021>
- 816 Roberts, S. B., & Gavery, M. R. (2012). Is There a Relationship between DNA  
817 Methylation and Phenotypic Plasticity in Invertebrates? *Frontiers in Physiology*, 2,  
818 116. <https://doi.org/10.3389/fphys.2011.00116>
- 819 Rodrigues, L. J., & Grotoli, A. G. (2007). Energy reserves and metabolism as indicators  
820 of coral recovery from bleaching. *Limnology and Oceanography*, 52(5), 1874–1882.  
821 <https://doi.org/10.4319/lo.2007.52.5.1874>
- 822 Rodriguez-Casariago, J. A., Ladd, M. C., Shantz, A. A., Lopes, C., Cheema, M. S., Kim,  
823 B., Roberts, S. B., Fourqurean, J. W., Ausio, J., Burkepile, D. E., & Eirin-Lopez, J.  
824 M. (2018). Coral epigenetic responses to nutrient stress: Histone H2A.X  
825 phosphorylation dynamics and DNA methylation in the staghorn coral *Acropora*  
826 *cervicornis*. *Ecology and Evolution*, 8(23), 12193–12207.  
827 <https://doi.org/10.1002/ece3.4678>
- 828 Rosental, B., Kozhekbaeva, Z., Fernhoff, N., Tsai, J. M., & Traylor-Knowles, N. (2017).  
829 Coral cell separation and isolation by fluorescence-activated cell sorting (FACS). In  
830 *BMC Cell Biology* (Vol. 18, Issue 1). <https://doi.org/10.1186/s12860-017-0146-8>
- 831 Schweinsberg, M., Weiss, L. C., Striewski, S., Tollrian, R., & Lampert, K. P. (2015). More  
832 than one genotype: how common is intracolony genetic variability in scleractinian  
833 corals? *Molecular Ecology*, 24(11), 2673–2685. <https://doi.org/10.1111/mec.13200>
- 834 Shumaker, A., Putnam, H. M., Qiu, H., Price, D. C., EHUD, Z., Harel, A., Wagner, N. E.,  
835 Gates, R. D., Yoon, H. S., & Bhattacharya, D. (2019). Genome analysis of the rice  
836 coral *Montipora capitata*. *Scientific Reports*, 9(2571).  
837 <https://doi.org/10.1038/s41598-019-39274-3>
- 838 Suarez-Ulloa, V., Rivera-Casas, C., Michel, M., & Eirin-Lopez, J. M. (2018). Seasonal  
839 variation and epigenetic changes in the flat tree oyster *Isognomon alatus* during a 2-  
840 year study of a mangrove ecosystem in North Biscayne Bay, Florida. *Journal of*  
841 *Shellfish Research*, 38(1):79-88 (2019). <https://doi.org/10.2983/035.038.0108>
- 842 Suzuki, M. M., Kerr, A. R. W., De Sousa, D., & Bird, A. (2007). CpG methylation is

## Informed choice of methylation analyses

- 843 targeted to transcription units in an invertebrate genome. *Genome Research*, 17(5),  
844 625–631. <https://doi.org/10.1101/gr.6163007>
- 845 Thorvaldsdóttir, H., Robinson, J. T., & Mesirov, J. P. (2013). Integrative Genomics  
846 Viewer (IGV): high-performance genomics data visualization and exploration.  
847 *Briefings in Bioinformatics*, 14(2), 178–192. <https://doi.org/10.1093/bib/bbs017>
- 848 Tweedie, S., Charlton, J., Clark, V., & Bird, A. (1997). Methylation of genomes and  
849 genes at the invertebrate-vertebrate boundary. *Molecular and Cellular Biology*,  
850 17(3), 1469–1475. <https://www.ncbi.nlm.nih.gov/pubmed/9032274>
- 851 van Gurp, T. P., Wagemaker, N. C. A. M., Wouters, B., Vergeer, P., Ouborg, J. N. J., &  
852 Verhoeven, K. J. F. (2016). epiGBS: reference-free reduced representation bisulfite  
853 sequencing. *Nature Methods*, 13(4), 322–324. <https://doi.org/10.1038/nmeth.3763>
- 854 Velotta, J. P., Ivy, C. M., Wolf, C. J., Scott, G. R., & Cheviron, Z. A. (2018). Maladaptive  
855 phenotypic plasticity in cardiac muscle growth is suppressed in high-altitude deer  
856 mice. *Evolution; International Journal of Organic Evolution*, 72(12), 2712–2727.  
857 <https://doi.org/10.1111/evo.13626>
- 858 Venkataraman, Y. R., Downey-Wall, A. M., Ries, J., Westfield, I., White, S. J., Roberts,  
859 S. B., & Lotterhos, K. E. (2020). General DNA methylation patterns and  
860 environmentally-induced differential methylation in the eastern oyster (*Crassostrea*  
861 *virginica*). *Frontiers in Marine Science*. <https://doi.org/10.3389/fmars.2020.00225>
- 862 Vidal-Dupiol, J., Chaparro, C., Pratlong, M., Pontaroti, P., Grunau, C., & Mitta, G. (2019).  
863 Sequencing, de novo assembly and annotation of the genome of the scleractinian  
864 coral, *Pocillopora acuta*. In *bioRxiv* (p. 698688). <https://doi.org/10.1101/698688>
- 865 Zemach, A., McDaniel, I. E., Silva, P., & Zilberman, D. (2010). Genome-wide  
866 evolutionary analysis of eukaryotic DNA methylation. *Science*, 328(5980), 916–919.  
867 <https://doi.org/10.1126/science.1186366>

## Informed choice of methylation analyses

### **Data accessibility**

The datasets supporting the conclusions of this article are available in the Coral Methylation Methods Comparison repository, <http://doi.org/10.17605/OSF.IO/X5WAZ>, and included within the article (and its additional file(s)). All raw data can be accessed under NCBI Bioproject PRJNA691891.

### **Author contributions**

HMP designed the study and collected the samples. YRV, SAT, MRG, HMP, and SBR performed data analyses and drafted the manuscript. DB, AD-W, JME-L, KMJ, KEL, and JBP provided analytical insight and manuscript revisions. All authors read and approved the final manuscript.

### **Ethics declarations**

#### *Ethics approval and consent to participate*

The coral samples were collected under Hawai'i Department of Aquatic Resources Special Activity Permit SAP 2019-60.

#### *Consent for publication*

Not applicable.

#### *Competing interests*

The authors declare that they have no competing interests.

### **Figures and Tables**

## Informed choice of methylation analyses

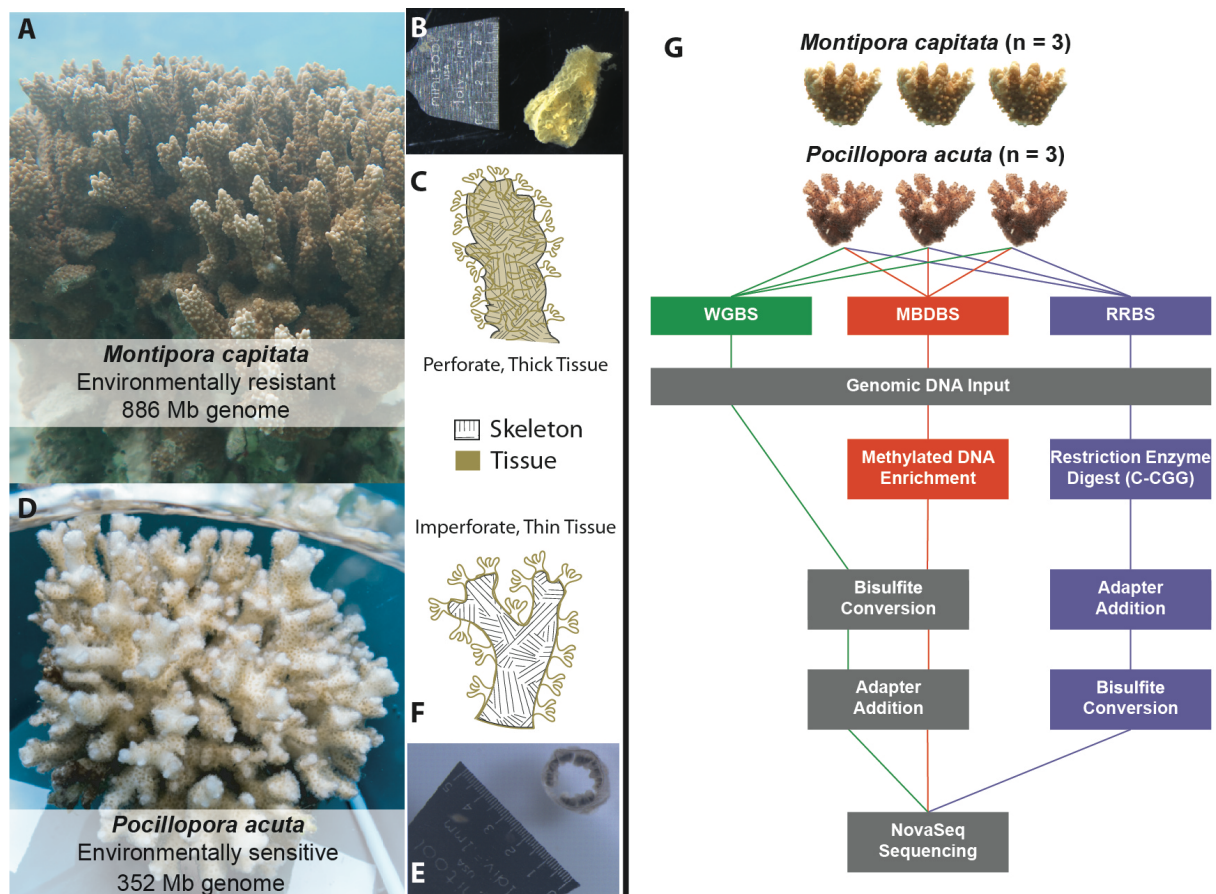

**Figure 1. Experimental design.** Three biological replicate coral samples were obtained from both coral species. A) *M. capitata*, where B) a cross section of a decalcified fragment reveals thick tissue, and C) a perforate tissue skeletal interaction. In contrast in D) *P. acuta*, a E) a cross section of a decalcified fragment reveals thin tissue, and F) an imperforate tissue skeletal interaction. DNA was extracted from each coral sample and split for use in Whole Genome Bisulfite Sequencing (WGBS), Reduced Representation Bisulfite Sequencing (RRBS), and Methyl-CpG Binding Domain Bisulfite Sequencing (MBDBS) library preparation methods. Three libraries were generated for each of the three methods, yielding nine libraries for each species and 18 libraries total.

## Informed choice of methylation analyses

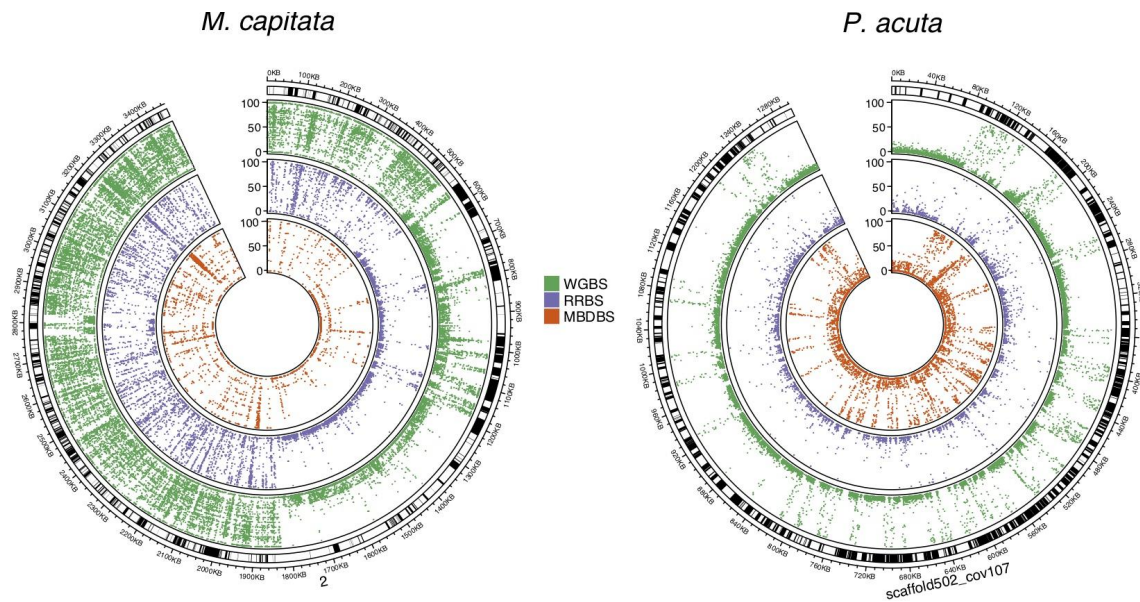

**Figure 2. Mean percent methylation of CpGs.** Data is presented for CpGs with 5x coverage for each method on the largest scaffolds of each genome. The outer track shows the scaffold locations and dots indicate the percent methylation as indicated by the y-axes from 0-100% for each of the inner tracks.

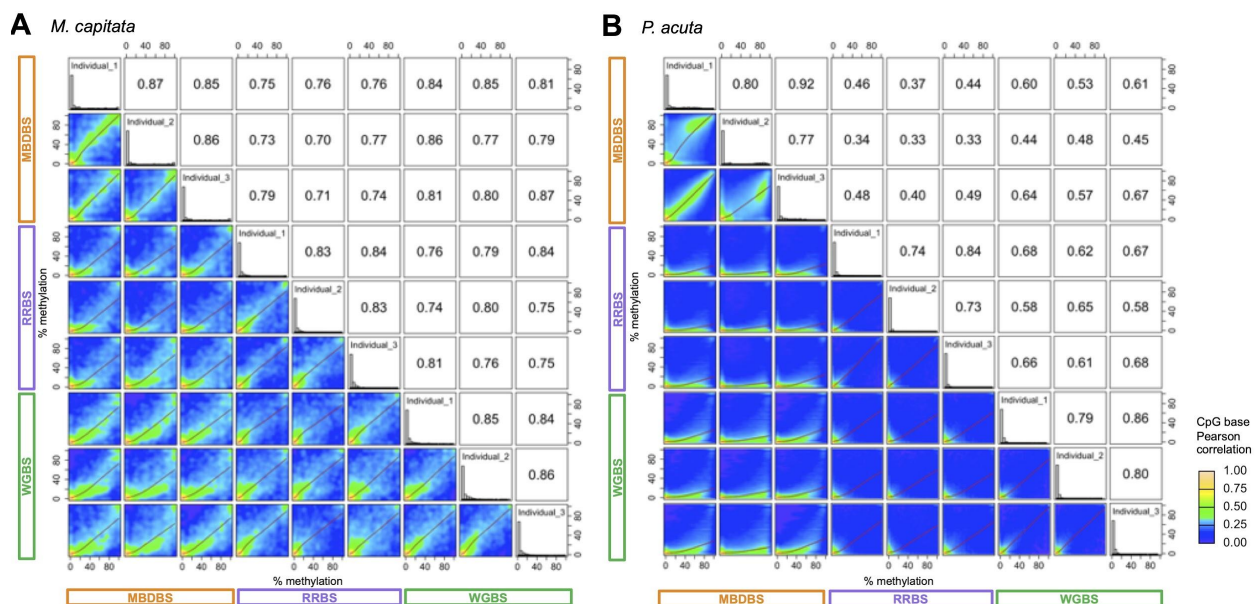

**Figure 3. Matrix of pairwise scatter plots for shared CpG loci.** Data is presented for CpG covered at  $\geq 5x$  across all samples) for A) *M. capitata* ( $n=4,666$  common loci) and B) *P. acuta* ( $n=93,714$  common loci). The red lines represent linear regression fits and the

## Informed choice of methylation analyses

green lines are polynomial regression fits. Pearson correlation coefficients for each pairwise comparison are presented in the upper right boxes. Methods are color coded on the X and Y axes (WGBS = green, MBDBS = purple, and RRBS = orange) and replicate samples are indicated on the diagonal along with histograms of % CpG methylation.

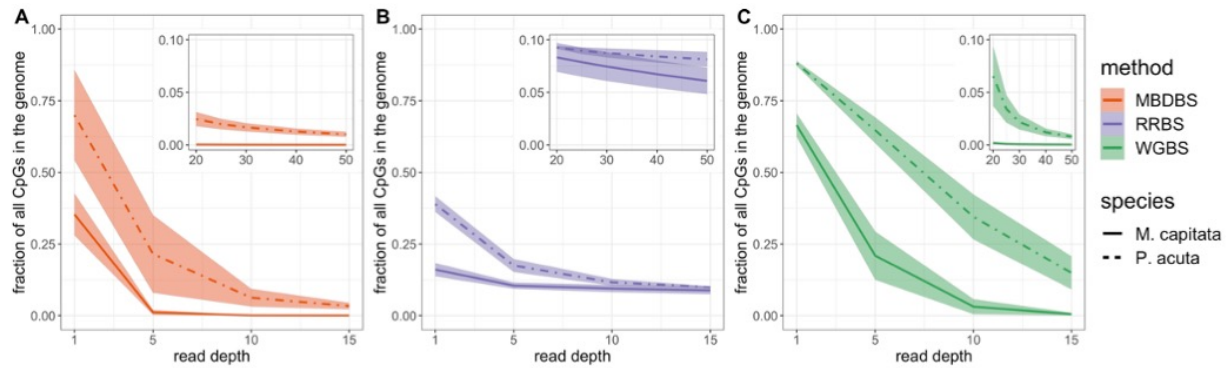

**Figure 4. CpG site coverage across library preparation methods.** Mean fraction of CpG sites in the genome covered at different sequencing depths (read depths) by (A) MBDBS libraries, (B) RRBS libraries, and (C) WGBS libraries with standard deviations shown by shaded areas (see Additional file 2: [Table ST2](#) for number of reads in each sample).

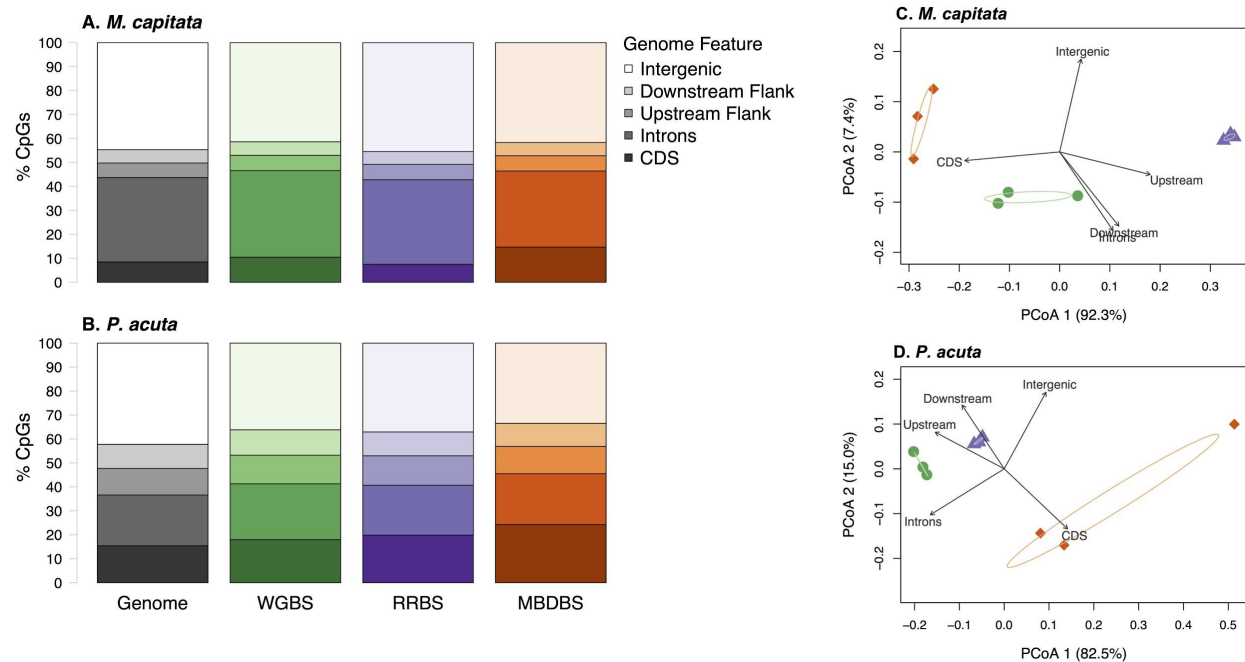

**Figure 5. Percent of CpGs detected by sequencing methods in genome features A) for *M. capitata* and B) *P. acuta*.** Genome features considered were coding sequences

## Informed choice of methylation analyses

(CDS), introns, 1 Kb flanking regions upstream (Upstream Flank) or downstream of genes (Downstream Flank), and intergenic regions Principal Coordinate Analyses associated with PERMANOVA and beta-dispersion tests related to Additional file 12: [Table ST6](#) that show differences in proportion of CpGs in various genomic locations (CDS, introns, upstream flanks, downstream flanks, and intergenic regions) for **C**) *M. capitata* and **D**) *P. acuta*. WGBS is represented by green circles, RRBS by purple triangles, and MBDBS by orange diamonds. Percent variation explained by each PCoA axis is included in the axis label. Ellipses depict 95% confidence intervals for each sequencing method. All eigenvectors are significant at the  $\alpha = 0.05$  level.

## [Supplementary Information](#)
